# Supplementary material for: Physiological and transcriptome analyses for assessing the effects of exogenous uniconazole on drought tolerance in hemp (Cannabis sativa L.)
Source: PubMed Central journal article supplement (PMC8280108; doi:10.1038/s41598-021-93820-6), 2021-07-14
Supplement: 41598_2021_93820_MOESM1_ESM.pdf [file 41598_2021_93820_MOESM1_ESM.pdf]

## **TITLE:**

# **Physiological and Transcriptome Analyses for Assessing the Effects of Exogenous Uniconazole on Drought Tolerance in Hemp (*Cannabis sativa* L.)**

## **AUTHORS:**

**Ying Jiang <sup>1,2</sup>, Yufeng Sun <sup>2</sup>, Dianfeng Zheng <sup>1,3,4</sup>, Chengwei Han <sup>2</sup>, Kun Cao <sup>1,2</sup>, Lei Xu <sup>1</sup>, Shuxia Liu <sup>1,2</sup>, Yanyong Cao <sup>5</sup> & Naijie Feng <sup>1,3,4</sup>,**

## **AFFINITIONS**

<sup>1</sup>College of Agronomy, Heilongjiang Bayi Agricultural University, Daqing 163316, China. <sup>2</sup>Daqing Branch of Heilongjiang Academy of Sciences, Daqing 163319, China. <sup>3</sup>College of Coastal Agricultural Sciences, Guangdong Ocean University, Zhanjiang, 524088, China. <sup>4</sup>Shenzhen Research Institute of Guangdong Ocean University, Shenzhen, Guangdong, 518108, China. <sup>5</sup>Institute of Cereal Crops, Henan Academy of Agricultural Sciences, Zhengzhou 450002, China. Correspondence and requests for materials should be addressed to N. F. (email: [byndfnj@126.com](mailto:byndfnj@126.com)) or Y. C. (email: [yanyongcao@126.com](mailto:yanyongcao@126.com)).

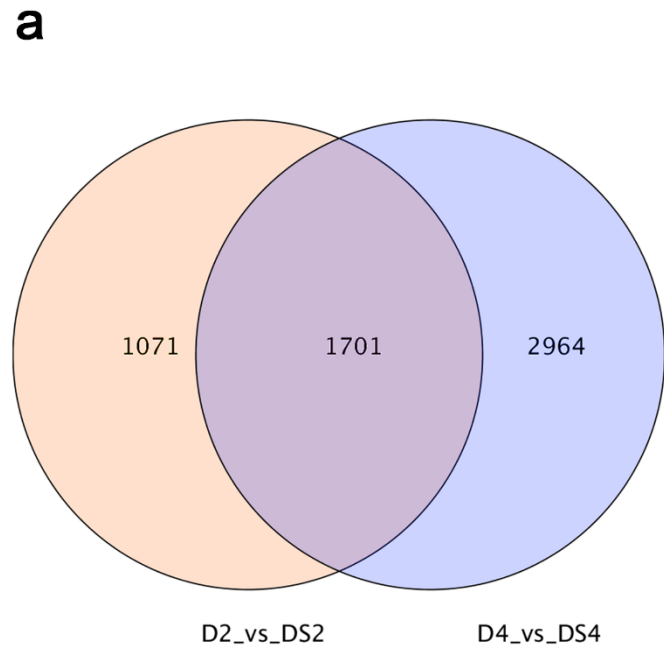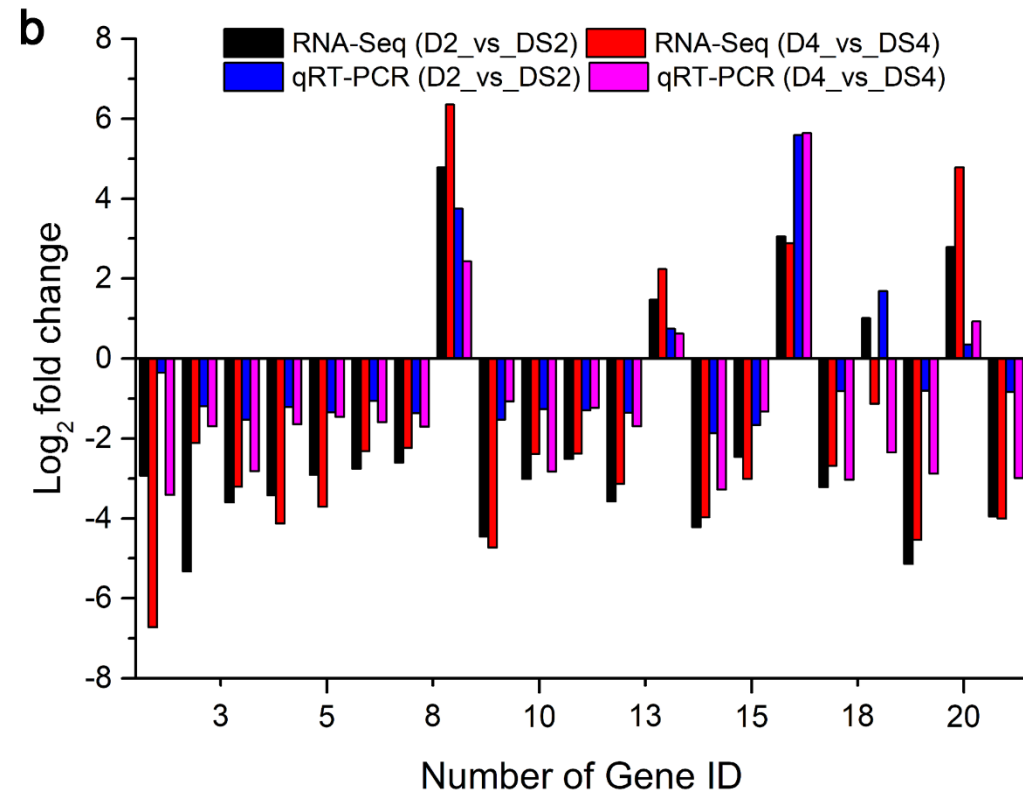

**Supplementary Figure S1. Effect of uniconazole on genome-wide gene expression profiling of industrial hemp seedlings under drought stress.** Uniconazole-induced venn diagram of the differentially expressed genes for 2 and 4 days under drought stress. The intersection was the number of common differentially expressed genes after different treatment days (a). qRT-PCR validation of 21 DEGs. Expression changes of 21 genes of D and DS was analyzed by qRT-PCR and compared with RNA-Seq data (b). D2\_vs\_DS2 means drought stress for 2 days / drought stress treated with uniconazole for 2 days; D4\_vs\_DS4 means drought stress for 4 days / drought stress treated with uniconazole for 4 days
