# Supplementary material for: Physiological and transcriptome analyses for assessing the effects of exogenous uniconazole on drought tolerance in hemp (Cannabis sativa L.)
Source: PubMed Central journal article supplement (PMC8280108; doi:10.1038/s41598-021-93820-6), 2021-07-14
Supplement: 41598_2021_93820_MOESM2_ESM.pdf [file 41598_2021_93820_MOESM2_ESM.pdf]

## **TITLE:**

**Physiological and Transcriptome Analyses for  
Assessing the Effects of Exogenous Uniconazole  
on Drought Tolerance in Hemp (*Cannabis sativa*  
L.)**

## **AUTHORS:**

**Ying Jiang <sup>1,2</sup>, Yufeng Sun <sup>2</sup>, Dianfeng Zheng <sup>1,3,4</sup>, Chengwei Han <sup>2</sup>, Kun Cao <sup>1,2</sup>,  
Lei Xu <sup>1</sup>, Shuxia Liu <sup>1,2</sup>, Yanyong Cao <sup>5</sup>, & Naijie Feng <sup>1,3,4</sup>,**

## **AFFINITIONS**

<sup>1</sup>College of Agronomy, Heilongjiang Bayi Agricultural University, Daqing 163316, China. <sup>2</sup>Daqing Branch of Heilongjiang Academy of Sciences, Daqing 163319, China. <sup>3</sup>College of Coastal Agricultural Sciences, Guangdong Ocean University, Zhanjiang, 524088, China. <sup>4</sup>Shenzhen Research Institute of Guangdong Ocean University, Shenzhen, Guangdong, 518108, China. <sup>5</sup>Institute of Cereal Crops, Henan Academy of Agricultural Sciences, Zhengzhou 450002, China. Correspondence and requests for materials should be addressed to N. F. (email: [byndfnj@126.com](mailto:byndfnj@126.com)) or Y. C. (email: [yanyongcao@126.com](mailto:yanyongcao@126.com)).

**Supplementary Table S1. Evaluation statistics of sequencing data**

| Sample | Total Reads | Clean reads | Clean bases   | Mapped Reads           | GC Content | %≥Q30  |
|--------|-------------|-------------|---------------|------------------------|------------|--------|
| D2-1   | 41,363,184  | 20,681,592  | 6,175,384,072 | 30,930,443<br>(74.78%) | 45.26%     | 94.36% |
| D2-2   | 39,506,934  | 19,753,467  | 5,894,484,272 | 29,669,323<br>(75.10%) | 45.25%     | 95.17% |
| D2-3   | 39,969,310  | 19,984,655  | 5,962,931,224 | 30,045,508<br>(75.17%) | 45.26%     | 95.01% |
| D4-1   | 40,979,786  | 20,489,893  | 6,124,499,708 | 30,064,442<br>(73.36%) | 44.66%     | 91.73% |
| D4-2   | 38,966,386  | 19,483,193  | 5,816,373,684 | 28,658,169<br>(73.55%) | 44.65%     | 92.50% |
| D4-3   | 38,948,046  | 19,474,023  | 5,821,193,082 | 28,815,286<br>(73.98%) | 44.83%     | 92.72% |
| DS2-1  | 40,788,036  | 20,394,018  | 6,090,390,944 | 30,552,542<br>(74.91%) | 45.22%     | 92.78% |
| DS2-2  | 41,995,488  | 20,997,744  | 6,271,485,606 | 30,699,975<br>(73.10%) | 45.58%     | 92.64% |
| DS2-3  | 41,727,142  | 20,863,571  | 6,226,507,656 | 30,397,266<br>(72.85%) | 45.44%     | 92.59% |
| DS4-1  | 42,484,078  | 21,242,039  | 6,330,791,892 | 31,710,236<br>(74.64%) | 45.23%     | 95.72% |
| DS4-2  | 54,906,362  | 27,453,181  | 8,184,300,418 | 42,250,286<br>(76.95%) | 45.41%     | 95.83% |
| DS4-3  | 44,609,406  | 22,304,703  | 6,649,827,682 | 33,376,699<br>(74.82%) | 45.48%     | 95.77% |

**Supplementary Table S2. Uniconazole-induced expression patterns of 11 porphyrin and chlorophyll metabolism genes under drought stress**

| Gene ID                       | D2_vs_DS2                    | D4_vs_DS4                    | Annotation                                                       |
|-------------------------------|------------------------------|------------------------------|------------------------------------------------------------------|
|                               | Log <sub>2</sub> fold change | Log <sub>2</sub> fold change |                                                                  |
| Cannabis_sativa_newGene_12230 | -2.05                        | -1.26                        | Pheophorbide a oxygenase                                         |
| Cannabis_sativa_newGene_2056  | -1.44                        | -2.22                        | Chlorophyll(ide) b reductase                                     |
| Cannabis_sativa_newGene_6391  | 1.49                         | 1.37                         | Magnesium-protoporphyrin IX monomethyl ester (oxidative) cyclase |
| Cannabis_sativa_newGene_6392  | 1.56                         | 1.67                         | Magnesium-protoporphyrin IX monomethyl ester (oxidative) cyclase |
| Cannabis_sativa_newGene_6970  | -1.47                        | -1.93                        | Chlorophyll(ide) b reductase                                     |
| FN07522.1.g                   | 1.08                         | 1.51                         | Protochlorophyllide reductase                                    |
| FN09070.1.g                   | 3.05                         | 2.88                         | Chlorophyllase                                                   |
| FN10979.1.g                   | 3.84                         | 3.44                         | Chlorophyllase                                                   |
| FN16017.1.g                   | 1.3                          | 1.24                         | Magnesium chelatase subunit H                                    |
| FN25584.1.g                   | -1.53                        | -2.3                         | Chlorophyll(ide) b reductase                                     |
| FN36173.1.g                   | 2.13                         | 1.13                         | Glutamyl-tRNA reductase                                          |

**Supplementary Table S3. Uniconazole-induced expression patterns of 7 photosynthesis-antenna proteins genes under drought stress**

| Gene ID                       | D2_vs_DS2        | D4_vs_DS4        | Annotation                                                    |
|-------------------------------|------------------|------------------|---------------------------------------------------------------|
|                               | Log2 fold change | Log2 fold change |                                                               |
| Cannabis_sativa_newGene_22639 | 1.43             | 1.35             | Light-harvesting complex I chlorophyll a/b binding protein 3  |
| FN00679.1.g                   | 4.36             | 2.49             | Light-harvesting complex II chlorophyll a/b binding protein 1 |
| FN08854.1.g                   | 1.46             | 1.72             | Light-harvesting complex I chlorophyll a/b binding protein 2  |
| FN11590.1.g                   | 1.47             | 1.98             | Light-harvesting complex II chlorophyll a/b binding protein 1 |
| FN20197.1.g                   | 1.06             | 1.01             | Light-harvesting complex I chlorophyll a/b binding protein 5  |
| FN20752.1.g                   | 1.57             | 1.6              | Light-harvesting complex I chlorophyll a/b binding protein 4  |
| FN25278.1.g                   | 1.66             | 1.44             | Light-harvesting complex II chlorophyll a/b binding protein 5 |

**Supplementary Table S4. Uniconazole-induced expression patterns of 20 photosynthesis genes under drought stress**

| Gene ID                       | D2_vs_DS2                    | D4_vs_DS4                    | Annotation                                        |
|-------------------------------|------------------------------|------------------------------|---------------------------------------------------|
|                               | Log <sub>2</sub> fold change | Log <sub>2</sub> fold change |                                                   |
| Cannabis_sativa_newGene_11217 | 1.03                         | 1.57                         | Cytochrome c6                                     |
| Cannabis_sativa_newGene_11948 | 1.78                         | 1.18                         | Photosystem I subunit IV                          |
| Cannabis_sativa_newGene_18499 | 1.07                         | 1.07                         | Ferredoxin-NADP reductase                         |
| Cannabis_sativa_newGene_18790 | 1.13                         | 1.01                         | Ferredoxin-NADP reductase                         |
| Cannabis_sativa_newGene_2824  | 1.17                         | 1.52                         | Ferredoxin                                        |
| Cannabis_sativa_newGene_3177  | 1.28                         | 1.11                         | Oxygen-evolving enhancer protein 2                |
| Cannabis_sativa_newGene_8056  | 1.89                         | 1.3                          | Photosystem I reaction center subunit IV B        |
| FN00583.1.g                   | 3.1                          | 2.26                         | Ferredoxin                                        |
| FN03578.1.g                   | 1.16                         | 1.65                         | Ferredoxin                                        |
| FN05836.1.g                   | 1.56                         | 1.49                         | Photosystem I subunit VI                          |
| FN09237.1.g                   | 1.64                         | 1.11                         | Photosystem I subunit V                           |
| FN12930.1.g                   | 2.64                         | 2.15                         | Photosystem I subunit X                           |
| FN15653.1.g                   | 1.88                         | 1.57                         | Ferredoxin                                        |
| FN19968.1.g                   | 1.48                         | 1.4                          | Photosystem I subunit II                          |
| FN22627.1.g                   | 1.4                          | 1.54                         | Plastocyanin                                      |
| FN25592.1.g                   | 1.17                         | 1.2                          | Photosystem I subunit XI                          |
| FN28964.1.g                   | 2.16                         | 1.63                         | Photosystem II 13kDa protein                      |
| FN29818.1.g                   | 1.15                         | 1.12                         | Photosystem II oxygen-evolving enhancer protein 2 |
| FN35311.1.g                   | 1.95                         | 2.17                         | Photosystem II PsbW protein                       |
| FN36957.1.g                   | 1.96                         | 1                            | Photosystem II oxygen-evolving enhancer protein 3 |

**Supplementary Table S5. Uniconazole-induced expression patterns of 5 sucrose-phosphate synthase genes in starch and sucrose metabolism pathway under drought stress**

| Gene ID     | D2_vs_DS2                    | D4_vs_DS4                    | Annotation                 |
|-------------|------------------------------|------------------------------|----------------------------|
|             | Log <sub>2</sub> fold change | Log <sub>2</sub> fold change |                            |
| FN06206.1.g | -0.68                        | -1.03                        | Sucrose-phosphate synthase |
| FN08251.1.g | -0.78                        | -1.13                        | Sucrose-phosphate synthase |
| FN15293.1.g | -1.04                        | -0.81                        | Sucrose-phosphate synthase |
| FN19565.1.g | -0.71                        | -1.05                        | Sucrose-phosphate synthase |
| FN33647.1.g | -0.68                        | -1.18                        | Sucrose-phosphate synthase |

**Supplementary Table S6. Uniconazole-induced expression patterns of 39 starch and sucrose metabolism genes under drought stress**

| Gene ID                       | D2_vs_DS2           | D4_vs_DS4           | Annotation                                 |
|-------------------------------|---------------------|---------------------|--------------------------------------------|
|                               | Log <sub>2</sub> FC | Log <sub>2</sub> FC |                                            |
| Cannabis_sativa_newGene_11111 | 1.03                | 1.23                | Glycogen phosphorylase                     |
| Cannabis_sativa_newGene_11739 | 1.25                | 1.59                | Fructokinase                               |
| Cannabis_sativa_newGene_1196  | 1.98                | 2.32                | Alpha-trehalase                            |
| Cannabis_sativa_newGene_1359  | -1.31               | -2.46               | Trehalose 6-phosphate synthase/phosphatase |
| Cannabis_sativa_newGene_14442 | -1.6                | -1.23               | Beta-amylase                               |
| Cannabis_sativa_newGene_15537 | -2.76               | -2.32               | Beta-glucosidase                           |
| Cannabis_sativa_newGene_15584 | 2.59                | 1.26                | Beta-glucosidase                           |
| Cannabis_sativa_newGene_16510 | -2.61               | -2.24               | Beta-glucosidase                           |
| Cannabis_sativa_newGene_17325 | 1.08                | 1.27                | Glucose-1-phosphate adenylyltransferase    |
| Cannabis_sativa_newGene_18682 | -3.01               | -2.39               | Sucrose synthase                           |
| Cannabis_sativa_newGene_19025 | 1.44                | -2.86               | Beta-glucosidase                           |
| Cannabis_sativa_newGene_2041  | 1.4                 | 1.44                | Fructokinase                               |
| Cannabis_sativa_newGene_20881 | -2.51               | -2.38               | Beta-glucosidase                           |
| Cannabis_sativa_newGene_21583 | 2.43                | 1.16                | Beta-glucosidase                           |
| Cannabis_sativa_newGene_22098 | -1.55               | -2.34               | Trehalose 6-phosphate synthase/phosphatase |
| Cannabis_sativa_newGene_3872  | 1.01                | 1.47                | Glucose-1-phosphate adenylyltransferase    |
| Cannabis_sativa_newGene_4716  | -1.41               | -1.27               | Trehalose 6-phosphate synthase/phosphatase |
| Cannabis_sativa_newGene_6352  | -1.26               | -1.01               | UDP-glucuronic acid decarboxylase          |
| Cannabis_sativa_newGene_7682  | 2.99                | 1.5                 | Beta-glucosidase                           |
| Cannabis_sativa_newGene_7780  | 1.27                | 1.68                | Fructokinase                               |
| Cannabis_sativa_newGene_8314  | -1.05               | -1.74               | Acid beta-fructofuranosidase               |
| FN00010.1.g                   | 1.46                | 1.67                | Glucan endo-1,3-beta-glucosidase           |
| FN00198.1.g                   | 1.16                | 1.29                | Glucan endo-1,3-beta-glucosidase           |
| FN08139.1.g                   | -2.46               | -3.01               | Beta-glucosidase                           |
| FN09580.1.g                   | 1.76                | 2.39                | Glucan endo-1,3-beta-glucosidase           |
| FN12624.1.g                   | -2.79               | -2.29               | Sucrose synthase                           |
| FN15223.1.g                   | 1.94                | 1.72                | Alpha-trehalase                            |
| FN17900.1.g                   | 1.89                | 3.28                | 1,4-alpha-glucan-branching enzyme          |
| FN21504.1.g                   | 1.85                | 2.08                | Alpha-trehalase                            |
| FN22315.1.g                   | 2.09                | 2.89                | Glycogen phosphorylase                     |
| FN24873.1.g                   | -2.04               | -3.43               | Trehalose 6-phosphate synthase/phosphatase |
| FN25057.1.g                   | -1.2                | -2.1                | Fructokinase                               |
| FN25284.1.g                   | -1.38               | -2.24               | Trehalose 6-phosphate synthase/phosphatase |
| FN28846.1.g                   | 1.08                | 1.9                 | Pectinesterase                             |
| FN30251.1.g                   | -1.27               | -2.04               | Trehalose 6-phosphate synthase/phosphatase |
| FN33579.1.g                   | 2.79                | 4.78                | 1,4-alpha-glucan-branching enzyme          |
| FN35530.1.g                   | -1.47               | -2.11               | Trehalose 6-phosphate synthase/phosphatase |
| FN36185.1.g                   | -2.45               | -1.98               | Pectinesterase                             |
| FN37634.1.g                   | 2.08                | 2.62                | Glycogen phosphorylase                     |

**Supplementary Table S7. Uniconazole-induced expression patterns of 12 nitrogen metabolism genes under drought stress**

| Gene ID                       | D2_vs_DS2                    | D4_vs_DS4                    | Annotation                                     |
|-------------------------------|------------------------------|------------------------------|------------------------------------------------|
|                               | Log <sub>2</sub> fold change | Log <sub>2</sub> fold change |                                                |
| Cannabis_sativa_newGene_10837 | -1.54                        | -1.95                        | Glutamate synthase (NADH)                      |
| Cannabis_sativa_newGene_1215  | -3.6                         | -3.21                        | Glutamate dehydrogenase (NAD(P) <sup>+</sup> ) |
| Cannabis_sativa_newGene_18532 | 2.18                         | 1.33                         | Carbonic anhydrase                             |
| Cannabis_sativa_newGene_23402 | -3.58                        | -3.14                        | Glutamate dehydrogenase (NAD(P) <sup>+</sup> ) |
| Cannabis_sativa_newGene_4468  | 1.8                          | 2.42                         | Nitrate/nitrite transporter                    |
| Cannabis_sativa_newGene_471   | 2                            | 1.3                          | Carbonic anhydrase                             |
| Cannabis_sativa_newGene_6112  | 1.09                         | -1.08                        | Glutamate dehydrogenase (NAD(P) <sup>+</sup> ) |
| Cannabis_sativa_newGene_8219  | 3.43                         | 2.65                         | Carbonic anhydrase                             |
| FN06032.1.g                   | -1.35                        | -1.85                        | Glutamate synthase (NADH)                      |
| FN11569.1.g                   | -1.68                        | -3.01                        | Carbonic anhydrase                             |
| FN22131.1.g                   | -1.15                        | -1.95                        | Glutamine synthetase                           |
| FN28192.1.g                   | 1.01                         | -1.13                        | Glutamate dehydrogenase (NAD(P) <sup>+</sup> ) |



**Supplementary Table S8. Uniconazole-induced expression patterns of 28 plant hormone signal transduction genes under drought stress**

| Gene ID                       | D2_vs_DS2                    | D4_vs_DS4                    | Annotation                                    |
|-------------------------------|------------------------------|------------------------------|-----------------------------------------------|
|                               | Log <sub>2</sub> fold change | Log <sub>2</sub> fold change |                                               |
| Cannabis_sativa_newGene_14430 | 1.68                         | 1.51                         | Jasmonate ZIM domain-containing protein       |
| Cannabis_sativa_newGene_18071 | 1.64                         | 1.47                         | Jasmonate ZIM domain-containing protein       |
| Cannabis_sativa_newGene_19036 | 1.93                         | 1.19                         | Auxin transporter protein                     |
| Cannabis_sativa_newGene_21556 | -1.05                        | -1.77                        | Transcription factor TGA                      |
| Cannabis_sativa_newGene_6221  | 2.17                         | 1.94                         | SAUR family protein                           |
| Cannabis_sativa_newGene_8004  | -1.8                         | -1.02                        | Serine/threonine-protein kinase SRK2          |
| Cannabis_sativa_newGene_919   | -1.56                        | -1.14                        | Serine/threonine-protein kinase SRK2          |
| Cannabis_sativa_newGene_9451  | 1.47                         | 2.24                         | DELLA protein                                 |
| FN00395.1.g                   | 1.51                         | 2.39                         | Auxin responsive GH3 gene family              |
| FN01004.1.g                   | 1.49                         | 2.89                         | Auxin responsive GH3 gene family              |
| FN01628.1.g                   | -4.22                        | -3.97                        | Auxin responsive GH3 gene family              |
| FN03063.1.g                   | -6.17                        | -1.66                        | SAUR family protein                           |
| FN03133.1.g                   | 1.16                         | 1.56                         | BR-signaling kinase                           |
| FN03185.1.g                   | -1.61                        | -2.25                        | SAUR family protein                           |
| FN04245.1.g                   | 1.96                         | 2.65                         | Transcription factor MYC2                     |
| FN04959.1.g                   | -1.09                        | -1.75                        | Transcription factor TGA                      |
| FN08651.1.g                   | 1.78                         | 1.64                         | Auxin-responsive protein IAA                  |
| FN10311.1.g                   | -1.24                        | -1.36                        | Histidine kinase 3                            |
| FN12036.1.g                   | 1.54                         | 1.08                         | Cyclin D3                                     |
| FN12857.1.g                   | 1.4                          | 2.06                         | Histidine kinase 4                            |
| FN15644.1.g                   | 1.63                         | 2.83                         | Auxin responsive GH3 gene family              |
| FN18674.1.g                   | 1.52                         | 2.48                         | Histidine kinase 6                            |
| FN19201.1.g                   | 1.93                         | 2.35                         | Two-component response regulator ARR-A family |
| FN20151.1.g                   | -1.25                        | -1.01                        | Protein phosphatase 2C                        |
| FN27264.1.g                   | 2.1                          | 2.26                         | Auxin-responsive protein IAA                  |
| FN27301.1.g                   | 1.43                         | 2.52                         | Histidine kinase 4                            |
| FN31094.1.g                   | -5.14                        | -4.54                        | Auxin responsive GH3 gene family              |
| FN33877.1.g                   | -1.03                        | -1.76                        | SAUR family protein                           |

**Supplementary Table S9. The sequence of gene-specific primers**

| Number | Gene ID                       | Forward primer sequence (5' to 3') | Reverse primer sequence (5' to 3') |
|--------|-------------------------------|------------------------------------|------------------------------------|
| 1      | Cannabis_sativa_newGene_11496 | ACAACAATGAGACATACACAAA             | CCCAAAGTGAAGAAAGCACTAC             |
| 2      | Cannabis_sativa_newGene_12033 | GCAAGTGGTGGTGTAGTGTT               | GCTCCTCCTCCGACTCTACT               |
| 3      | Cannabis_sativa_newGene_1215  | AGGAGTTATCATTCTCCAGACA             | GTTACCTTATCTTCATCCCA               |
| 4      | Cannabis_sativa_newGene_12744 | AAATGGGTAAGCAAGATAGCAC             | CCTGAGCAAAGTAAATGGAAA              |
| 5      | Cannabis_sativa_newGene_15493 | GATGGAGCCTGAGTGTGATAA              | CGTAGTTCTTGTTTCATTGAGTCC           |
| 6      | Cannabis_sativa_newGene_15537 | CTATCTCTCCCTCTCACACTC              | TATAATGATCCACTCCTGCCT              |
| 7      | Cannabis_sativa_newGene_16510 | GTGAAACAAATTAATAACATGGAAA          | TACACAAATGAAGCCAATATCTCT           |
| 8      | Cannabis_sativa_newGene_16571 | AAAGATCCCAACTACACGACA              | CCTACCGATAACAAGCAGAAATC            |
| 9      | Cannabis_sativa_newGene_17026 | ATCAACAGGACAGATTGGGTA              | GAGAAATATCAAGCAAGTGCAA             |
| 10     | Cannabis_sativa_newGene_18682 | TATGCAGGAAGCAGTGGTAAT              | GTAATGGCCTCAACAGAGAGA              |
| 11     | Cannabis_sativa_newGene_20881 | TTTGTATGGTCTTTGCTGGAT              | TTTGGGTATCTCTTGAGCTTG              |
| 12     | Cannabis_sativa_newGene_23402 | CTTTCTTCCCTGCTCTGTTT               | AAGGTTGGTGTGTAATGATGTG             |
| 13     | Cannabis_sativa_newGene_9451  | CGGTTTCTCTATCAATCCTTTC             | GGAGTTTCTTCTTTCATCTGCT             |
| 14     | FN01628.1.g                   | AAGTCCGAAACAAAGACACC               | AAGGAATCAGGGCAAAGAA                |
| 15     | FN08139.1.g                   | ATGCTGCTGCTTATCATACT               | ACCTCCTTGTTCTTCTGTTT               |
| 16     | FN09070.1.g                   | GGAGAGGAGGAAGCCCTAT                | CAGGACGATCAACCAACAT                |
| 17     | FN22313.1.g                   | TTCTCCTTCACTCTTCTCTCTAA            | CTAACTTTATGGCTGGTTTGTG             |
| 18     | FN28192.1.g                   | GTACTTTGGCCTCATTGTTG               | CTCTGGCATTGTCATGTTGTA              |
| 19     | FN31094.1.g                   | ACCATACGACCCTTACACCA               | GCAGAGACCACAGAGGAGTT               |
| 20     | FN33579.1.g                   | ATGGAAGCAAATACAGGGTCT              | ATCGTAATGGTGGATGAGAAA              |
| 21     | FN33773.1.g                   | CAACAAGGATTCAGAGGGTAA              | ACGCACAAATAAACTTGGTAAA             |
| 22     | GAPDH                         | AATGAGCACGAATACAAGTCAG             | AAGAGAATGAAATGAAATGAACC            |

**Supplementary Table S10. qRT-PCR validation of DEGs**

| Number | Gene ID                       | Relative gene expression by RNA-Seq |            | Relative gene expression by qRT-PCR |            |
|--------|-------------------------------|-------------------------------------|------------|-------------------------------------|------------|
|        |                               | D2 vs. DS2                          | D4 vs. DS4 | D2 vs. DS2                          | D4 vs. DS4 |
|        |                               |                                     |            |                                     |            |
| 1      | Cannabis_sativa_newGene_11496 | -2.93                               | -6.72      | -0.36                               | -3.41      |
| 2      | Cannabis_sativa_newGene_12033 | -5.32                               | -2.11      | -1.20                               | -1.70      |
| 3      | Cannabis_sativa_newGene_1215  | -3.60                               | -3.21      | -1.53                               | -2.82      |
| 4      | Cannabis_sativa_newGene_12744 | -3.42                               | -4.13      | -1.22                               | -1.65      |
| 5      | Cannabis_sativa_newGene_15493 | -2.91                               | -3.71      | -1.35                               | -1.46      |
| 6      | Cannabis_sativa_newGene_15537 | -2.76                               | -2.32      | -1.06                               | -1.59      |
| 7      | Cannabis_sativa_newGene_16510 | -2.61                               | -2.24      | -1.37                               | -1.71      |
| 8      | Cannabis_sativa_newGene_16571 | 4.78                                | 6.35       | 3.75                                | 2.43       |
| 9      | Cannabis_sativa_newGene_17026 | -4.45                               | -4.73      | -1.53                               | -1.07      |
| 10     | Cannabis_sativa_newGene_18682 | -3.01                               | -2.39      | -1.27                               | -2.83      |
| 11     | Cannabis_sativa_newGene_20881 | -2.51                               | -2.38      | -1.30                               | -1.24      |
| 12     | Cannabis_sativa_newGene_23402 | -3.58                               | -3.14      | -1.36                               | -1.70      |
| 13     | Cannabis_sativa_newGene_9451  | 1.47                                | 2.24       | 0.75                                | 0.62       |
| 14     | FN01628.1.g                   | -4.22                               | -3.97      | -1.87                               | -3.28      |
| 15     | FN08139.1.g                   | -2.46                               | -3.01      | -1.67                               | -1.33      |
| 16     | FN09070.1.g                   | 3.05                                | 2.88       | 5.59                                | 5.64       |
| 17     | FN22313.1.g                   | -3.22                               | -2.69      | -0.82                               | -3.03      |
| 18     | FN28192.1.g                   | 1.01                                | -1.13      | 1.69                                | -2.35      |
| 19     | FN31094.1.g                   | -5.14                               | -4.54      | -0.81                               | -2.88      |
| 20     | FN33579.1.g                   | 2.79                                | 4.78       | 0.35                                | 0.93       |
| 21     | FN33773.1.g                   | -3.95                               | -4.00      | -0.84                               | -2.99      |
